# Fast, accurate antibody structure prediction from deep learning on massive set of natural antibodies

Jeffrey A. Ruffolo<sup>a</sup>, Lee-Shin Chu<sup>b</sup>, Sai Pooja Mahajan<sup>b</sup>, and Jeffrey J. Gray<sup>a,b</sup>

<sup>a</sup>Program in Molecular Biophysics, The Johns Hopkins University, Baltimore, MD 21218; <sup>b</sup>Department of Chemical and Biomolecular Engineering, The Johns Hopkins University, Baltimore, MD 21218

This manuscript was compiled on April 21, 2022

1 **Antibodies have the capacity to bind a diverse set of antigens, and they have become critical therapeutics and diagnostic molecules. The**  
2 **binding of antibodies is facilitated by a set of six hypervariable loops that are diversified through genetic recombination and mutation. Even**  
3 **with recent advances, accurate structural prediction of these loops remains a challenge. Here, we present IgFold, a fast deep learning method**  
4 **for antibody structure prediction. IgFold consists of a pre-trained language model trained on 558M natural antibody sequences followed by**  
5 **graph networks that directly predict backbone atom coordinates. IgFold predicts structures of similar or better quality than alternative**  
6 **methods (including AlphaFold) in significantly less time (under one minute). Accurate structure prediction on this timescale makes possible**  
7 **avenues of investigation that were previously infeasible. As a demonstration of IgFold's capabilities, we predicted structures for 105K paired**  
8 **antibody sequences, expanding the observed antibody structural space by over 40 fold.**

antibodies | deep learning | language modeling | structure prediction

## 1 Introduction

2 Antibodies play a critical role in the immune response against foreign pathogens. Through genetic recombination and  
3 hyper-mutation, the adaptive immune system is capable of generating a vast number of potential antibodies. Immune  
4 repertoire sequencing provides a glimpse into an individual's antibody population (1). Analysis of these repertoires  
5 can further our understanding of the adaptive immune response (2) and even suggest potential therapeutics (3).  
6 However, sequence data alone provides only a partial view into the immune repertoire. The interactions that facilitate  
7 antigen binding are determined by the structure of a set of six loops that make up a complementarity determining  
8 region (CDR). Accurate modeling of these CDR loops provides insights into these binding mechanisms and promises  
9 to enable rational design of specific antibodies (4). Five of the CDR loops tend to adopt canonical folds that can  
10 be predicted effectively by sequence similarity (5). However, the third CDR loop of the heavy chain (CDR H3) has  
11 proven a challenge to model due to its increased diversity, both in sequence and length (6, 7). Further, the position of  
12 the H3 loop at the interface between the heavy and light chains makes its conformation dependent on the inter-chain  
13 orientation (8, 9). Given its central role in binding, advances in prediction of H3 loop structures are critical for  
14 understanding antibody-antigen interactions and enabling rational design of antibodies.

15 Deep learning methods have brought about a revolution in protein structure prediction (10, 11). With the  
16 development of AlphaFold, accurate protein structure prediction has largely become accessible to all (12). Beyond  
17 monomeric proteins, AlphaFold-Multimer has demonstrated an impressive ability to model protein complexes (13).  
18 However, performance on antibody structures remains to be extensively validated. Meanwhile, antibody-specific deep  
19 learning methods such as DeepAb (14) and ABlooper (15) have significantly improved CDR loop modeling accuracy,  
20 including for the challenging CDR H3 loop (7, 16). DeepAb predicts a set of inter-residue geometric constraints that  
21 are fed to Rosetta to produce a complete  $F_V$  structure (14). ABlooper predicts CDR loop structures in an end-to-end  
22 fashion, with minimal post-prediction refinement required, while also providing an estimate of loop quality (15).  
23 While effective, certain design decisions limit the utility of both models. DeepAb predictions are relatively slow (ten  
24 minutes per sequence), cannot effectively incorporate template data, and offer little insight into expected quality.

J.A.R. and J.J.G. conceptualized the project. All authors contributed to the methodology. J.A.R. developed the software and conducted the investigation. J.J.G. supervised the project. J.A.R. wrote the original manuscript. All authors edited the manuscript.

Dr. Gray is an unpaid board member of the Rosetta Commons. Under institutional participation agreements between the University of Washington, acting on behalf of the Rosetta Commons, Johns Hopkins University may be entitled to a portion of revenue received on licensing Rosetta software including methods discussed/developed in this study. As a member of the Scientific Advisory Board, JJG has a financial interest in Cyrus Biotechnology. Cyrus Biotechnology distributes the Rosetta software, which may include methods developed in this study. These arrangements have been reviewed and approved by the Johns Hopkins University in accordance with its conflict-of-interest policies.

<sup>1</sup>To whom correspondence should be addressed. E-mail: jgrayjhu.edu

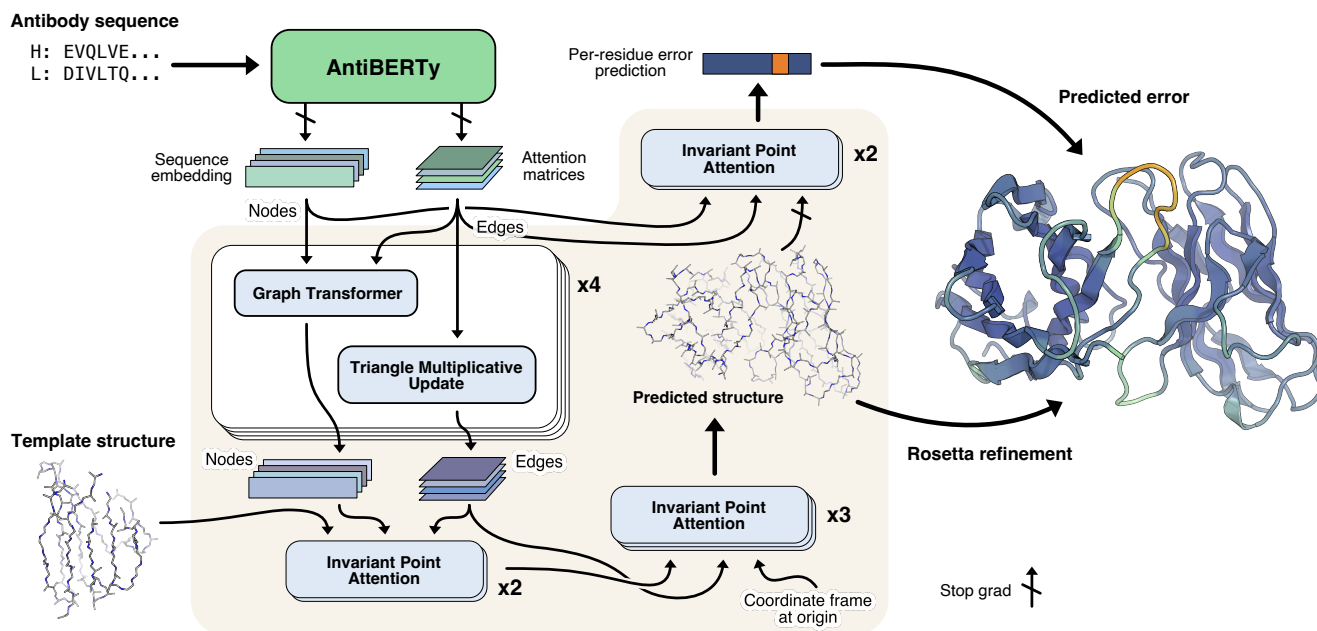

**Fig. 1.** Diagram of method for end-to-end prediction of antibody structures. Antibody sequences are converted into contextual embeddings using AntiBERTy, a pre-trained language model. From these representations, IgFold uses a series of transformer layers to directly predict atomic coordinates for the protein backbone atoms. For each residue, IgFold also provides an estimation of prediction quality. Refinement of predictions and addition of side chains is performed by Rosetta.

25 ABlooper predictions, while faster and more informative, rely on less accurate homology models for the framework  
 26 structure and cannot incorporate CDR loop templates or predict nanobody structures.

27 Concurrent with advances in structure prediction, self-supervised learning on massive sets of unlabeled protein  
 28 sequences has shown remarkable utility across protein modeling tasks (17, 18). Embeddings from transformer encoder  
 29 models trained for masked language modeling have been used for variant prediction (19), evolutionary analysis (20, 21),  
 30 and as features for protein structure prediction (22, 23). Auto-regressive transformer models have been used to  
 31 generate functional proteins entirely from sequence learning (24). The wealth of immune repertoire data provided by  
 32 sequencing experiments has enabled development of antibody-specific language models. Models trained for masked  
 33 language modeling have been shown to learn meaningful representations of immune repertoire sequences (21, 25, 26),  
 34 and even repurposed to humanize antibodies (27). Generative models trained on sequence infilling have been shown  
 35 to generate high-quality antibody libraries (28, 29).

36 In this work, we present IgFold: a fast, accurate model for end-to-end prediction of antibody structures from  
 37 sequence. IgFold leverages embeddings from AntiBERTy (21), a language model pre-trained on 558M natural antibody  
 38 sequences, to directly predict the atomic coordinates that define the antibody structure. Predictions from IgFold  
 39 match the accuracy of the recent AlphaFold models (10, 13) while being much faster (under one minute). IgFold also  
 40 provides flexibility beyond the capabilities of alternative antibody-specific models, including robust incorporation of  
 41 template structures and support for nanobody modeling.

## 42 Results

43 **End-to-end prediction of antibody structure.** Our method for antibody structure prediction, IgFold, utilizes learned  
 44 representations from the pre-trained AntiBERTy language model to directly predict 3D atomic coordinates (Figure 1).  
 45 Structures from IgFold are accompanied by a per-residue accuracy estimate, which provides insights into the quality  
 46 of the prediction.

47 **Embeddings from pre-trained model encode structural features.** The limited number of experimentally determined anti-  
 48 body structures (thousands (30)) presents a difficulty in training an effective antibody structure predictor. In the  
 49 absence of structural data, self-supervised language models provide a powerful framework for extracting patterns  
 50 from the significantly greater number (billions (31)) of natural antibody sequences identified by immune repertoire  
 51 sequencing studies. For this work, we used AntiBERTy (21), a transformer language model pre-trained on 558M  
 52 natural antibody sequences, to generate embeddings for structure prediction. Similar to the role played by alignments

of evolutionarily related sequences for general protein structure prediction (32), embeddings from AntiBERTy act as a contextual representation that places individual sequences within the broader antibody space.

Prior work has demonstrated that protein language models can learn structural features from sequence pre-training alone (17, 33). To investigate whether sequence embeddings from AntiBERTy contained nascent structural features, we generated embeddings for the set of 3,467 paired antibody sequences with experimentally determined structures in the PDB. For each sequence, we extracted the portions of the embedding corresponding to the six CDR loops and averaged to obtain fixed-sized CDR loop representations (one per loop). We then collected the embeddings for each CDR loop across all sequences and visualized using two-dimensional t-SNE (Figure S1). To determine whether the CDR loop representations encoded structural features, we labeled each point according to its canonical structural cluster. For CDR H3, which lacks canonical clusters, we instead labeled by loop length. For the five CDR loops that adopt canonical folds we observed clear organization within the embedded space. For the CDR H3 loop, we found that the embedding space did not separate into natural clusters, but was rather organized roughly in accordance with loop length. These results suggest that AntiBERTy has learned to encode CDR loop structural features through sequence pre-training alone.

**Coordinate prediction from sequence embeddings.** To predict 3D atomic coordinates from sequence embeddings, we adopt a graphical representation of antibody structure, with each residue as a node and information passing between all pairs of residues (Figure 1). The nodes are initialized using the final hidden layer embeddings from AntiBERTy. To initialize the edges, we collect the full set of inter-residue attention matrices from each layer of AntiBERTy. These attention matrices are a useful source of edge information as they encode the residue-residue information pathways learned by the pre-trained model. For paired antibodies, we concatenate the sequence embeddings from each chain and initialize inter-chain edges to zero. We do not explicitly provide a chain break delimiter, as the pre-trained language model already includes a positional embedding for each sequence. The structure prediction model begins with a series of four graph transformer (34) layers interleaved with edge updates via the triangle multiplicative layer proposed for AlphaFold (10).

Following the initial graph transformer layers, we incorporate structural template information into the nascent representation using invariant point attention (IPA) (10). In contrast to the application of IPA for the AlphaFold structure module, we fix the template coordinates and use IPA as a form of structure-aware self-attention. This enables the model to incorporate the local structural environment into the sequence representation directly from the 3D coordinates, rather than switching to an inter-residue representation (e.g., distance or contact matrices). We use three IPA layers to incorporate template information. Rather than search for structural templates for training, we generate template-like structures by corruption of the true label structures. Specifically, for 50% of training examples, we randomly select one to six consecutive segments of twenty residues and move the atomic coordinates to the origin. The remaining residues are provided to the model as a template. The deleted segments of residues are hidden from the IPA attention, so that the model only incorporates structural information from residues with meaningful coordinates.

Finally, we use another set of IPA layers to predict the final 3D antibody structure. Here, we employ a strategy similar to the AlphaFold structure module (10) and train a series of three IPA layers to translate and rotate each residue from an initialized position at the origin to the final predicted position. We depart slightly from the AlphaFold implementation and learn separate weights for each IPA layer, as well as allow gradient propagation through the rotations. To train the model for structure prediction, we minimize the mean-squared error between the predicted coordinates and the experimental structure after Kabsch alignment. In practice, we observe that the first IPA layer is sufficient to learn the global arrangement of residues (albeit in a compact form), while the second and third layers function to produce the properly scaled structure with correct bond lengths and angles (Figure S2).

**Per-residue error prediction.** Simultaneously with structure prediction training, we additionally train the model to estimate the error in its own predictions. For error estimation, we use two IPA layers that operate similarly to the template incorporation layers (i.e., without coordinate updates). The error estimation layers take as input the final predicted structure, as well as a separate set of node and edge features derived from the initial AntiBERTy features. We stop gradient propagation through the error estimation layers into the predicted structure to prevent the model from optimizing for accurately estimated, but highly erroneous structures. For each residue, the error estimation layers are trained to predict the deviation of the  $C_{\alpha}$  atom from the experimental structure after a Kabsch alignment of the beta barrel residues. We use a different alignment for error estimation than structure prediction to more closely mirror the conventional antibody modeling evaluation metrics. The model is trained to minimize the L1 norm of the predicted  $C_{\alpha}$  deviation minus the true deviation.

**Structure dataset augmentation with AlphaFold.** We sought to train the model on as many immunoglobulin structures as possible. From the Structural Antibody Database (SAbDab) (30), we obtained 4,275 structures consisting of

107 paired antibodies and single-chain nanobodies. Given the remarkable success of AlphaFold for modeling both protein  
108 monomers and complexes, we additionally explored the use of data augmentation to produce structures for training.  
109 To produce a diverse set of structures for data augmentation, we clustered (35) the paired and unpaired partitions  
110 of the Observed Antibody Space (31) at 40% and 70% sequence identity, respectively. This clustering resulted in  
111 16,141 paired sequences and 26,971 unpaired sequences. We predicted structures for both sets of sequences using the  
112 original AlphaFold model. For the paired sequences, we modified the model inputs to enable complex modeling by  
113 inserting a gap in the positional embeddings (i.e., AlphaFold-Gap (12, 13)). For the unpaired sequences, we discarded  
114 the predicted structures with average pLDDT (AlphaFold error estimate) less than 85, leaving 22,132 structures.  
115 These low-confidence structures typically corresponded to sequences with missing residues at the N-terminus. During  
116 training, we sample randomly from the three datasets with examples weighted inversely to the size of their respective  
117 datasets, such that roughly one third of total training examples come from each dataset.

118 **Antibody structure prediction benchmark.** To evaluate the performance of IgFold against recent methods for antibody  
119 structure prediction, we assembled a non-redundant set of antibody structures deposited after compiling our training  
120 dataset. We chose to compare performance on a temporally separated benchmark to ensure that none of the methods  
121 evaluated had access to any of the structures during training. In total, our benchmark contains 67 paired antibodies  
122 and 21 nanobodies.

123 **Predicted structures are high quality before refinement.** As an end-to-end model, IgFold directly predicts structural  
124 coordinates as its output. However, these immediate structure predictions are not guaranteed to satisfy realistic  
125 molecular geometries. In addition to incorporating missing atomic details (e.g., side chains), refinement with  
126 Rosetta (36) corrects any such abnormalities. To better understand the impact of this refinement step, we compared  
127 the directly predicted structures for each target in the benchmark to their refined counterparts. In general, we  
128 observed very little change in the structures (Figure S3), with an average RMSD less than 0.5 Å before and after  
129 refinement. The exception to this trend is abnormally long CDR loops, particularly CDR H3. We compared the  
130 pre- and post-refinement structures for benchmark targets with three of the longest CDR H3 loops to those with  
131 shorter loops and found that the longer loops frequently contained unrealistic bond lengths and backbone torsion  
132 angles (Figure S4). Similar issues have been observed in recent previous work (15), indicating that directly predicting  
133 atomically correct long CDR loops remains a challenge.

134 **Accurate antibody structures in fraction of time.** We compared the performance of IgFold against a mixture of grafting  
135 and deep learning methods for antibody structure prediction. Although previous work has demonstrated significant  
136 improvements by deep learning over grafting-based methods, we continue to benchmark against grafting to track its  
137 performance as increasingly many antibody structures become available. For each benchmark target, we predicted  
138 structures using ABodyBuilder (37), DeepAb (14), ABlooper (15), and AlphaFold-Multimer (13). Of these methods,  
139 ABodyBuilder utilizes a grafting-based algorithm for structure prediction and the remaining use some form of deep  
140 learning. DeepAb and ABlooper are both trained specifically for paired antibody structure prediction, and have  
141 previously reported comparable performance. AlphaFold-Multimer has demonstrated state-of-the-art performance for  
142 protein complex prediction – however, performance on antibody structures specifically remains to be evaluated.

143 The performance of each method was assessed by measuring the backbone heavy-atom RMSD between the predicted  
144 and experimentally determined structures for the framework residues and each CDR loop. All RMSD values are  
145 measured after alignment of the framework residues. In general, we observed state-of-the-art performance for all of  
146 the deep learning methods while grafting performance continued to lag behind (Figure 2A, Table 1). On average, all  
147 methods predicted both the heavy and light chain framework structures with high accuracy (0.43-0.54 Å and 0.38 -  
148 0.45 Å, respectively). Similarly, for the CDR1 and CDR2 loops, all deep learning methods produced sub-angstrom  
149 predictions on average, with the grafting-based ABodyBuilder performing marginally worse. The largest improvement  
150 in prediction accuracy by deep learning methods is observed for the CDR3 loops.

151 We also considered the predicted orientation between the heavy and light chains, which is an important determinant  
152 of the overall binding surface (8, 9). Accuracy of the inter-chain orientation was evaluated by measuring the deviation  
153 from native of the inter-chain packing angle, inter-domain distance, heavy-opening angle, and light-opening angle.  
154 Each of these orientational coordinates are rescaled by dividing by their respective standard deviations (calculated  
155 over the set of experimentally determined antibody structures) and summed to obtain an orientational coordinate  
156 distance (OCD) (9). We found that in general deep learning methods produced  $F_V$  structures with OCD values below  
157 four, indicating that the predicted structures are typically within one standard deviation of the native structures for  
158 each of the components of OCD. The exception to this trend is ABlooper, which utilizes framework structures from  
159 ABodyBuilder and thus achieves a similar OCD value to the grafting-based method.

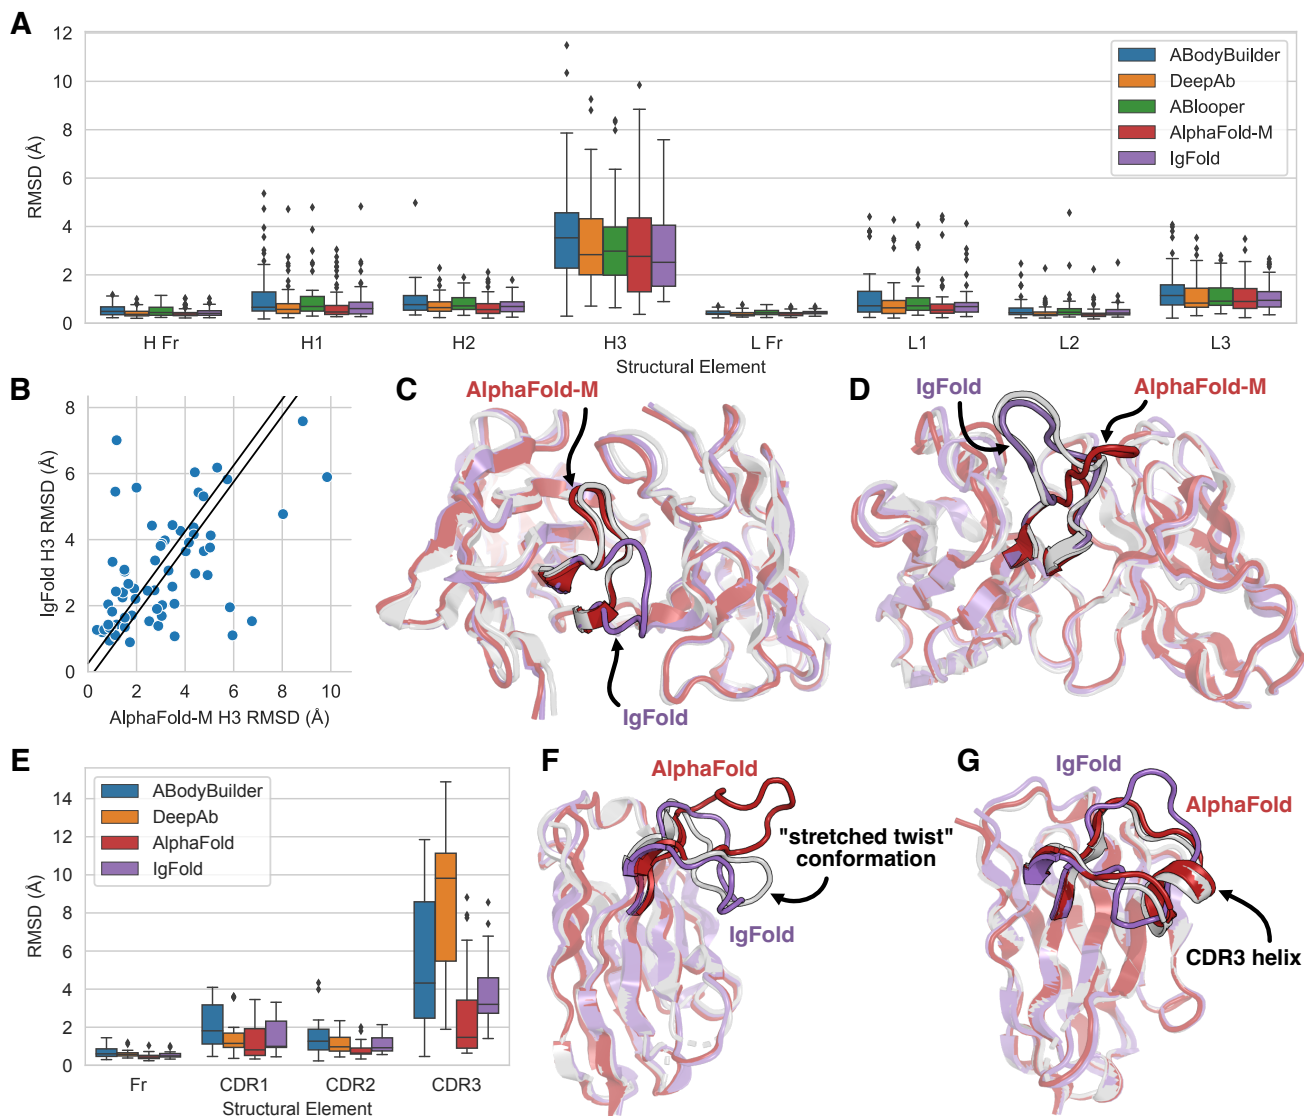

**Fig. 2.** Comparison of methods for antibody structure prediction. All root-mean-squared-deviation (RMSD) values calculated over backbone heavy atoms after alignment of the respective framework residues. (A) Benchmark performance of ABodyBuilder, DeepAb, ABlooper, AlphaFold-Multimer, and IgFold for paired antibody structure prediction. (B) Per-target comparison of CDR H3 loop structure prediction for IgFold and AlphaFold-Multimer, with each point representing the  $RMSD_{H3}$  for both methods on a single benchmark target. (C) Comparison of predicted CDR H3 loop predictions for target 7N3G ( $L_{H3} = 10$  residues) for IgFold ( $RMSD_{H3} = 7.01$  Å) and AlphaFold-Multimer ( $RMSD_{H3} = 1.18$  Å). (D) Comparison of predicted CDR H3 loop predictions for target 7ORA ( $L_{H3} = 14$  residues) for IgFold ( $RMSD_{H3} = 1.10$  Å) and AlphaFold-Multimer ( $RMSD_{H3} = 5.95$  Å). (E) Benchmark performance of ABodyBuilder, DeepAb, AlphaFold, and IgFold for nanobody structure prediction. (F) Comparison of predicted CDR H3 loop predictions for target 7AQZ ( $L_{CDR3} = 15$  residues) for IgFold ( $RMSD_{CDR3} = 3.20$  Å) and AlphaFold ( $RMSD_{CDR3} = 7.74$  Å). (G) Comparison of predicted CDR H3 loop predictions for target 7AQY ( $L_{CDR3} = 17$  residues) for IgFold ( $RMSD_{CDR3} = 3.93$  Å) and AlphaFold ( $RMSD_{CDR3} = 0.94$  Å).

160 Given the comparable aggregate performance of the deep learning methods, we further investigated the similarity  
161 between the structures predicted by each method. For each pair of methods, we measured the RMSD of framework and  
162 CDR loop residues, as well as the OCD, between the predicted structures for each benchmark target (Figure S8). We  
163 additionally plotted the distribution of structural similarities between IgFold and the alternative methods (Figure S9).  
164 We found that the framework structures (and their relative orientations) predicted by IgFold resembled those of  
165 DeepAb and AlphaFold-Multimer, but were less similar to those of ABodyBuilder and ABlooper. This is expected,  
166 given that ABlooper frameworks are based on ABodyBuilder grafts, while the frameworks from the remaining methods  
167 are entirely learned (and tend to be more accurate). Interestingly, we also observed that the CDR1 and CDR2 loops  
168 from IgFold, DeepAb, and AlphaFold-Multimer were quite similar on average. It is unclear why CDR loop structures  
169 from ABlooper, which was trained on a dataset similar to that of DeepAb and predicts CDR loops in an end-to-end  
170 manner like IgFold, tend to be dissimilar to those of DeepAb and IgFold. This may be due to framework inaccuracies  
171 degrading the quality of CDR loop structures.

172 Although the performance of the deep learning methods for antibody structure prediction is largely comparable,  
173 the speed of prediction is not. Grafting-based methods, such as ABodyBuilder, tend to be much faster than deep  
174 learning methods (if a suitable template can be found). For the present benchmark, ABodyBuilder was able to  
175 predict structures in seconds for 65 of 67 targets, only twice resorting to a time-consuming CDR H3 loop building  
176 procedure. However, as reported above, this speed is obtained at the expense of accuracy. DeepAb and ABlooper,  
177 which are more accurate and trained specifically for antibodies, require more time to predict full-atom structures (up  
178 to one minute for ABlooper and ten minutes for DeepAb). AlphaFold-Multimer, trained for general protein structure  
179 prediction from multiple sequence alignments, requires approximately one hour to predict full-atom structures. IgFold  
180 prediction speed is comparable to ABlooper, and is able to predict full-atom structures in less than a minute.

**Table 1. Accuracy of predicted antibody Fv structures**

| Method             | OCD  | H Fr (Å) | H1 (Å) | H2(Å) | H3 (Å) | L Fr (Å) | L1 (Å) | L2(Å) | L3 (Å) |
|--------------------|------|----------|--------|-------|--------|----------|--------|-------|--------|
| ABodyBuilder       | 4.90 | 0.54     | 1.10   | 0.94  | 3.75   | 0.43     | 1.07   | 0.58  | 1.37   |
| DeepAb             | 3.60 | 0.43     | 0.80   | 0.74  | 3.28   | 0.38     | 0.86   | 0.45  | 1.11   |
| ABlooper           | 4.53 | 0.51     | 0.95   | 0.82  | 3.20   | 0.45     | 0.99   | 0.59  | 1.15   |
| AlphaFold-Multimer | 3.69 | 0.43     | 0.75   | 0.69  | 3.02   | 0.39     | 0.82   | 0.41  | 1.13   |
| IgFold             | 3.77 | 0.45     | 0.80   | 0.75  | 2.99   | 0.45     | 0.83   | 0.51  | 1.07   |

181 **Deep learning methods converge on CDR H3 accuracy.** The average prediction accuracy for the highly variable, confor-  
182 mationally diverse CDR H3 loop was relatively consistent among the four deep learning methods evaluated (Table 1),  
183 though AlphaFold-Multimer and IgFold performed slightly better. Given this convergence in performance, we again  
184 considered the similarity between the CDR H3 loop structures predicted by each method. DeepAb and ABlooper  
185 produced the most similar CDR H3 loops, with an average RMSD of 2.29 Å between predicted structures (Figure S8).  
186 This may be reflective of the similar training datasets used for both methods, which were limited to experimentally  
187 determined antibody structures. AlphaFold-Multimer, by contrast, predicted the most distinct CDR H3 loops, with  
188 an average RMSD 2.81 - 2.95 Å to the other deep learning methods. Finally, IgFold CDR H3 loops were most similar  
189 to those of ABlooper, perhaps reflective of both models training for end-to-end coordinate prediction, but less similar  
190 than those of DeepAb.

191 The dissimilarity of predictions between IgFold and AlphaFold-Multimer is surprising, given the extensive use  
192 of AlphaFold-predicted structures for training IgFold. When we compared the per-target accuracy of IgFold and  
193 AlphaFold-Multimer, we found many cases where one method predicted the CDR H3 loop accurately while the other  
194 failed (Figure 2B). Indeed, approximately 20% of CDR H3 loops predicted by the two methods were greater than  
195 4 Å RMSD apart, meaning the methods often predict distinct conformations. In one such case (target 7N3G (38),  
196 Figure 2C), AlphaFold-Multimer effectively predicts the CDR H3 loop structure ( $\text{RMSD}_{\text{H3}} = 1.18 \text{ \AA}$ ) while IgFold  
197 predicts a distinct, and incorrect, conformation ( $\text{RMSD}_{\text{H3}} = 7.01 \text{ \AA}$ ). However, for another example (target 7ORA (39),  
198 Figure 2D), IgFold more accurately predicts the CDR H3 loop structure ( $\text{RMSD}_{\text{H3}} = 1.10 \text{ \AA}$ ) while AlphaFold-  
199 Multimer predicts an alternative conformation ( $\text{RMSD}_{\text{H3}} = 5.95 \text{ \AA}$ ). In practice, these distinct predictions may be  
200 useful for generating conformational ensembles for the CDR H3 loop.

201 **Fast nanobody structure prediction remains a challenge.** Single domain antibodies, or nanobodies, are an increasingly  
202 popular format for therapeutic development (40). Structurally, nanobodies share many similarities with paired  
203 antibodies, but with the notable lack of a second immunoglobulin chain. This, along with increased nanobody CDR3

204 loop length, makes accessible a wide range of CDR3 loop conformations not observed for paired antibodies (41). We  
205 compared the performance of IgFold for nanobody structure prediction to ABodyBuilder (37), DeepAb (14), and  
206 AlphaFold (10) (Figure 2E, Table 2). We omitted ABlooper from the comparison as it predicts only paired antibody  
207 structures.

208 As with paired antibodies, all methods evaluated produced highly accurate predictions for the framework residues,  
209 with the average RMSD ranging from 0.47 Å to 0.68 Å. For CDR1 and CDR2 loops, we observe a substantial  
210 improvement by IgFold and the other deep learning methods over ABodyBuilder, with AlphaFold achieving the  
211 highest accuracy on average. For the CDR3 loop, ABodyBuilder prediction quality is highly variable (average RMSD  
212 of 5.40 Å), reflective of the increased difficulty of identifying suitable template structures for the long, conformationally  
213 diverse loops. DeepAb achieves the worst performance for CDR3 loops, with an average RMSD of 8.41 Å, probably  
214 because its training dataset was limited to paired antibodies (14), and thus the model has never observed the full  
215 range of conformations accessible to nanobody CDR3 loops. AlphaFold displays remarkable performance for CDR3  
216 loops, with an average RMSD of 2.90 Å, consistent with its high accuracy on general protein sequences. IgFold CDR3  
217 predictions tend to be less accurate than those of AlphaFold (average RMSD of 3.85 Å), but are significantly faster to  
218 produce (less than 30 seconds for IgFold, versus 30 minutes for AlphaFold).

219 To better understand the distinctions between IgFold- and AlphaFold-predicted nanobody structures, we highlight  
220 two examples from the benchmark. First, we compared the structures predicted by both methods for the benchmark  
221 target 7AQZ (to be published, Figure 2F). This nanobody features a 15-residue CDR3 loop that adopts the "stretched-  
222 twist" conformation (41), in which the CDR3 loop bends to contact the framework residues that would otherwise be  
223 obstructed by a light chain in a paired antibody. IgFold correctly predicts this nanobody-specific loop conformation  
224 ( $\text{RMSD}_{\text{CDR3}} = 3.20 \text{ \AA}$ ), while AlphaFold predicts an extended CDR3 conformation ( $\text{RMSD}_{\text{CDR3}} = 7.74 \text{ \AA}$ ). Indeed,  
225 there are other cases where either IgFold or AlphaFold correctly predicts the CDR3 loop conformation while the  
226 other fails (see off-diagonal points in Figure S7G). In the majority of such cases, AlphaFold predicts the correct  
227 conformation, yielding the lower average CDR3 RMSD. However, the distinct conformations from both methods  
228 may be useful for producing an ensemble of structures for some applications. In the second example, we compared  
229 the structures predicted by both methods for the benchmark target 7AQY (to be published, Figure 2G). This  
230 nanobody has a long 17-residue CDR3 loop with a short helical region. Although both methods correctly predict  
231 the loop conformation, IgFold fails to predict the helical secondary structure, resulting in a less accurate prediction  
232 ( $\text{RMSD}_{\text{CDR3}} = 3.93 \text{ \AA}$ ) than that of AlphaFold ( $\text{RMSD}_{\text{CDR3}} = 0.94 \text{ \AA}$ ). Such structured loops highlight a key strength  
233 of AlphaFold, which was trained on a large dataset of general proteins and has thus encountered a broad variety of  
234 structural arrangements, over IgFold, which has observed relatively few such structures within its training dataset.  
235 Although AlphaFold performed better than IgFold for nanobodies, the distinct conformations from both methods may  
236 be useful for generating diverse predictions when large movement of CDR3 loops are expected.

**Table 2. Accuracy of predicted nanobody structures**

| Method       | Fr (Å) | CDR1 (Å) | CDR2(Å) | CDR3 (Å) |
|--------------|--------|----------|---------|----------|
| ABodyBuilder | 0.68   | 2.10     | 1.49    | 5.40     |
| DeepAb       | 0.62   | 1.61     | 1.11    | 8.41     |
| AlphaFold    | 0.47   | 1.26     | 0.79    | 2.90     |
| IgFold       | 0.55   | 1.58     | 1.06    | 3.85     |

237 **Error predictions identify inaccurate CDR loops.** Although antibody structure prediction methods continue to  
238 improve, accurate prediction of abnormal CDR loops (particularly long CDR H3 loops) remains inconsistent (6, 14, 15).  
239 Determining whether a given structural prediction is reliable is critical for effective incorporation of antibody structure  
240 prediction into workflows. During training, we task IgFold with predicting the deviation of each residue's  $C_{\alpha}$  atom  
241 from the native (under alignment of the beta barrel residues). We then use this predicted deviation as a per-residue  
242 error estimate to assess expected accuracy of different structural regions.

243 To assess the utility of IgFold's error predictions for identifying inaccurate CDR loops, we compared the average  
244 predicted error for each CDR loop to the RMSD between the predicted loop and the native structure for the paired  
245  $F_V$  and nanobody benchmarks. For five of the six paired  $F_V$  CDR loops, we observed significant correlations between  
246 the predicted error and the loop RMSDs from native (Figure S10). For CDR L2 loops were no significant correlations  
247 were observed; however, given the relatively high accuracy of CDR L2 loop predictions, there was little error to detect.  
248 For nanobodies, we observed significant correlations between the predicted error and RMSD for all of the CDR loops  
249 (Figure S11).

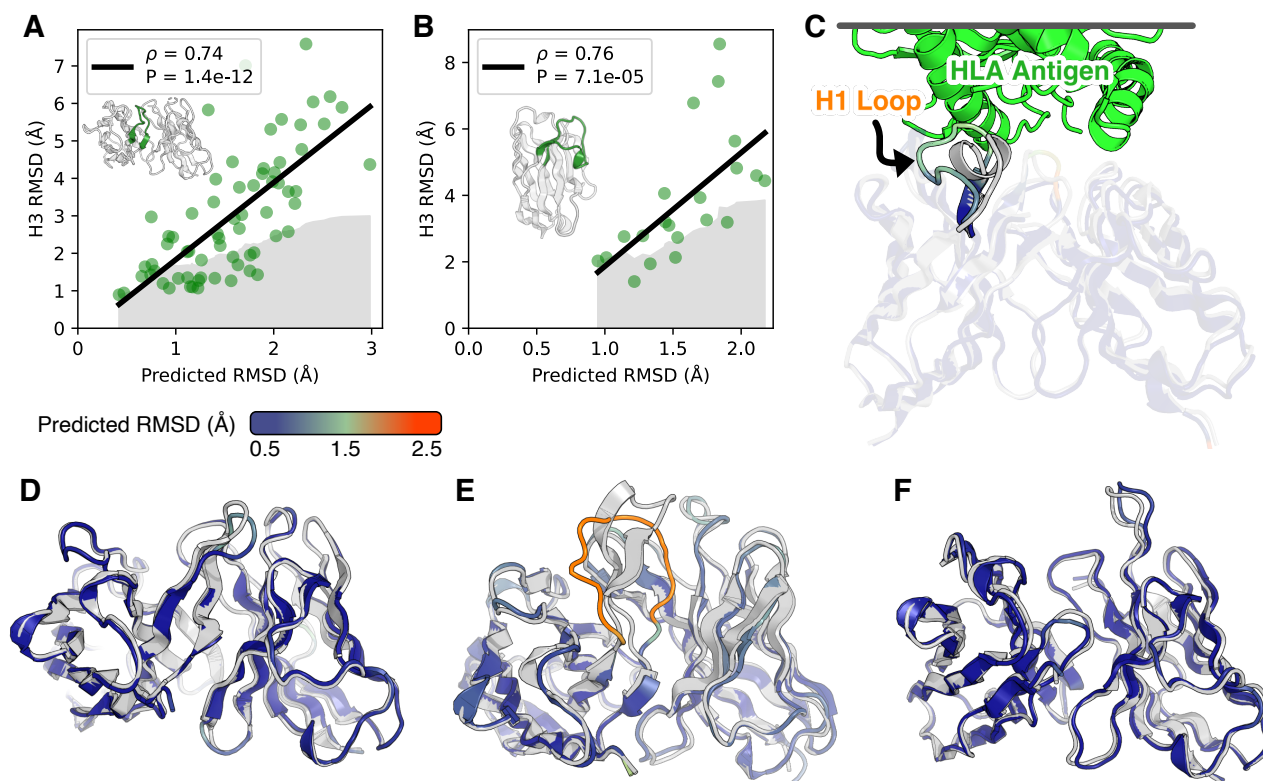

**Fig. 3.** Error estimation for predicted antibody structures. (A) Comparison of CDR H3 loop RMSD to predicted error for paired antibody structure benchmark. Gray space represents cumulative average RMSD of predicted CDR H3 loops from native structure. (B) Comparison of CDR3 loop RMSD to predicted error for nanobody structure benchmark. Gray space represents cumulative average RMSD of predicted CDR3 loops from native structure. (C) Predicted structure and error estimation for anti-HLA antibody with a randomized CDR H1 loop. (D) Predicted structure and error estimation for benchmark target 7RAH ( $L_{H3} = 12$  residues). (E) Predicted structure and error estimation for benchmark target 7RKS ( $L_{H3} = 18$  residues). (F) Predicted structure and error estimation for benchmark target 7O33 ( $L_{H3} = 3$  residues).

250 For the challenging-to-predict, conformationally diverse CDR3 loops, we observed significant correlations for both  
 251 paired antibody H3 loops (Figure 3A,  $\rho = 0.70$ ) and nanobody CDR3 loops (Figure 3B,  $\rho = 0.63$ ). To illustrate the  
 252 utility of error estimation for judging CDR H3 loop predictions, we highlight three examples from the benchmark.  
 253 The first is the benchmark target 7RAH (42), a mouse anti-adenylate-cyclase antibody with a 12-residue CDR H3  
 254 loop. For 7RAH, IgFold accurately predicts the extended beta sheet structure of the CDR H3 loop ( $RMSD_{H3}$   
 255  $= 1.43$  Å), and estimates a correspondingly lower RMSD (Figure 3D). The second target is 7RKS (43), a human  
 256 anti-SARS-CoV-2-receptor-binding-domain antibody with a 18-residue CDR H3 loop. IgFold struggles to predict the  
 257 structured beta sheet within this long H3 loop, instead predicting a broad unstructured conformation ( $RMSD_{H3}$   
 258  $= 6.18$  Å). Appropriately, the error estimation for the CDR H3 loop of 7RKS is much higher (Figure 3E). The third  
 259 example is 7O33 (44), a mouse anti-PAS (proline/alanine-rich sequence) antibody with a 3-residue CDR H3 loop.  
 260 Again, IgFold accurately predicts the structure of this short loop ( $RMSD_{H3} = 1.64$  Å) and provides a correspondingly  
 261 low error estimate (Figure 3F).

262 Antibody engineering campaigns often deviate significantly from the space of natural antibody sequences (45).  
 263 Predicting structures for such heavily engineered sequences is challenging, particularly for models trained primarily on  
 264 natural antibody structural data (such as IgFold). To investigate whether IgFold's error estimations can identify likely  
 265 mistakes in such sequences, we predicted the structure of an anti-HLA (human leukocyte antigen) antibody with a  
 266 sequence randomized CDR H1 loop (46) (Figure 3C). As expected, there is significant error in the predicted CDR H1  
 267 loop structure. However, the erroneous structure is accompanied by a high error estimate, revealing that the predicted  
 268 conformation is likely to be incorrect. This suggests that the RMSD predictions from IgFold are well-calibrated to  
 269 unnatural antibody sequences and should be informative for a broad range of antibody structure predictions.

270 **Template data is successfully incorporated into predictions.** For many antibody engineering workflows, partial  
 271 structural information is available for the antibody of interest. For example, crystal structures may be available  
 272 for the parent antibody upon which new CDR loops were designed. Incorporating such information into structure  
 273 predictions is useful for improving the quality of structure models. We simulated IgFold's behavior in this scenario



274 by predicting structures for the paired antibody and nanobody benchmark targets while providing the coordinates  
275 of all non-H3 residues as templates. In general, we found that IgFold was able to incorporate the template data  
276 into its predictions, with the average RMSD for all templated CDR loops being significantly reduced (IgFold[Fv-H3]:  
277 Figure 4A, IgFold[Fv-CDR3]: Figure 4E). To illustrate the effectiveness of structural data incorporation, we identified  
278 a paired antibody benchmark target with challenging-to-predict non-H3 CDR loops that were corrected by inclusion  
279 of templates. We consider the benchmark target 7AJ6 (to be published), for which IgFold inaccurately predicted the  
280 H2 and L1 loops (1.27 Å and 2.01 Å RMSD, respectively). We found that the model correctly incorporates the the  
281 template data for both loops (Figure 4B), reducing the H2 and L1 loop RMSD to 0.73 Å and 0.70 Å, respectively.

282 Having demonstrated successful incorporation of structural data into predictions using templates, we next investi-  
283 gated the impact on accuracy of the untemplated CDR H3 loop predictions. For the majority of targets, we found  
284 little change in the accuracy of CDR H3 loop structures with the addition of non-H3 template information. However,  
285 for several paired benchmark targets we observe notable improvements in predicted CDR H3 loop quality (Figure 4C).  
286 In one such case, for benchmark target 7RDL, inclusion of non-H3 structural data reduces the RMSD of the CDR  
287 H3 loop from 5.45 Å to 2.86 Å (Figure 4D). For nanobodies, we observe fewer cases with substantial improvement  
288 to CDR3 loop predictions given template data (Figure 4F). In only one case, benchmark target 7CZ0, do we see a  
289 meaningful improvement in RMSD (from 2.03 Å to 1.05 Å). For this target, the improvement in CDR3 accuracy is  
290 due to correction of C-terminal residues that anchor the end of the loop to the framework (Figure 4G).

291 We additionally experimented with providing the entire crystal structure to IgFold as template information. In this  
292 scenario, IgFold successfully incorporates the structural information of all CDR loops (including H3) into its predictions  
293 (IgFold[Fv]: Figure 4A, Figure 4E). Although this approach is of little practical value for structure prediction (as the  
294 correct structure is already known) it may be a useful approach for instilling structural information into pre-trained  
295 embeddings, which are valuable for other antibody learning tasks.

296 **Large-scale prediction of paired antibody structures.** The primary advantage of IgFold over highly accurate methods  
297 like AlphaFold is its speed at predicting antibody structures. This speed enables large-scale of antibody structures on  
298 modest compute resources. To demonstrate the utility of IgFold's speed, we predicted structures for a non-redundant  
299 set of 104,994 paired antibody sequences (clustered at 95% sequence identity) from the OAS database (31). These  
300 sequences are made up of 35,731 human, 16,356 mouse, and 52,907 rat antibodies. The structures are predicted with  
301 low estimated RMSD by IgFold, indicating that they are accurate (Figure S12). As of this publication, only 2,431  
302 unique paired antibody structures have been determined experimentally, and thus our predicted dataset represents an  
303 over 40-fold expansion of antibody structural space. These structures are made available for use in future studies.

## 304 Discussion

305 Protein structure prediction methods have advanced significantly in recent years, and they are now approaching  
306 the accuracy of the experimental structures upon which they are trained (10). These advances have been enabled  
307 in large part by effective exploitation of the structural information present in alignments of evolutionarily related  
308 sequences (MSAs). However, constructing a meaningful MSA is time-consuming, contributing significantly to the  
309 runtime of general protein structure prediction models, and making high-throughput prediction of many protein  
310 structures computationally prohibitive for many users. In this work, we presented IgFold: a fast, accurate model that  
311 specializes in prediction of antibody structures. We demonstrated that IgFold matches the accuracy of the highly  
312 accurate AlphaFold-Multimer model (13) for paired antibody structure prediction, and approaches the accuracy of  
313 AlphaFold for nanobodies. Though prediction accuracy is comparable, IgFold is significantly faster than AlphaFold,  
314 and is able to predict structures in under one minute. Further, for many targets IgFold and AlphaFold produce  
315 predict distinct conformations, which should be useful in assembling structural ensembles for applications where  
316 flexibility is important. Predicted structures are accompanied by informative error estimates, which provide critical  
317 information on the reliability of structures.

318 Analyses of immune repertoires have traditionally been limited to sequence data alone (1), as high-throughput  
319 antibody structure determination was experimentally prohibitive and prediction methods were too slow or inaccurate.  
320 However, incorporation of structural context has proven valuable, particularly for identification of sequence-disimilar  
321 binders to common epitopes (47). For example, grafting-based methods have been used to identify sequence-diverse  
322 but structurally similar antibodies against SARS-CoV-2 (48). The increased accuracy of IgFold, coupled with its  
323 speed, will make such methods more effective. Additionally, consideration of structural uncertainty via IgFold's error  
324 estimation should reduce the rate of false positives when operating on large volumes of sequences. As a demonstration  
325 of IgFold's capabilities, we predicted structures for over 100 thousand paired antibody sequences spanning three  
326 species. These structures expand on the number of experimentally determined antibody structures by a factor of 40.  
327 The vast majority of these structures are predicted with high confidence, suggesting that they are reliable. Although

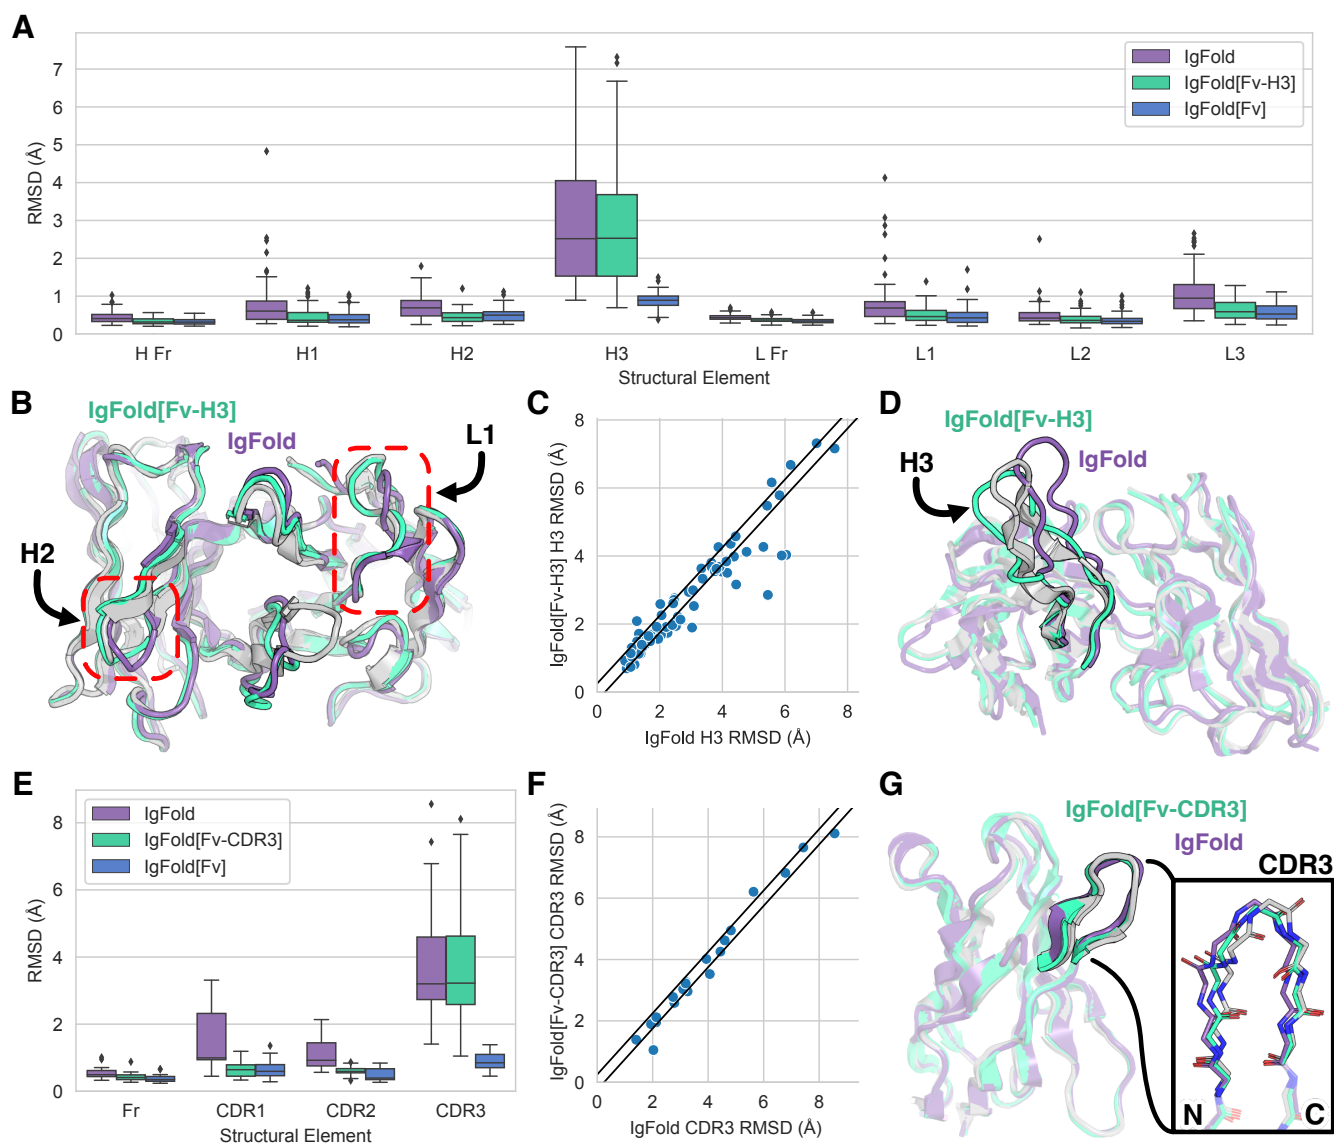

**Fig. 4.** Incorporation of structure data into IgFold predictions. (A) Paired antibody structure prediction benchmark results for IgFold without templates, IgFold given the  $F_V$  structure without the CDR H3 loop (IgFold[Fv-H3]), and IgFold given the complete Fv structure (IgFold[Fv]). (B) Superimposition of IgFold and IgFold[Fv-H3] predictions for benchmark target 7AJ6 onto native (gray). Errors in the predicted CDR H2 and L1 loops are corrected by inclusion of template data. (C) Per-target comparison of CDR H3 loop structure prediction for IgFold and IgFold[Fv-H3], with each point representing the  $RMSD_{H3}$  for both methods on a single benchmark target. (D) Superimposition of predicted CDR H3 loop predictions for target 7RDL ( $L_{H3} = 20$  residues) for IgFold ( $RMSD_{H3} = 5.45$  Å) and IgFold[Fv-H3] ( $RMSD_{H3} = 2.86$  Å) onto native (gray). (E) Nanobody structure prediction benchmark results for IgFold without templates, IgFold given the  $F_V$  structure without the CDR3 loop (IgFold[Fv-CDR3]), and IgFold given the complete Fv structure (IgFold[Fv]). (F) Per-target comparison of CDR3 loop structure prediction for IgFold and IgFold[Fv-CDR3], with each point representing the  $RMSD_{CDR3}$  for both methods on a single benchmark target. (G) Superimposition of predicted CDR3 loop predictions for target 7CZ0 ( $L_{CDR} = 6$  residues) for IgFold ( $RMSD_{CDR3} = 2.03$  Å) and IgFold[Fv-H3] ( $RMSD_{CDR3} = 1.05$  Å) onto native (gray).

our analysis of these structures was limited, we are optimistic that this large dataset will be useful for future studies and model development.

Despite considerable improvements by deep learning methods for general protein complex prediction, prediction of antibody-antigen binding remains a challenge. Even the recent AlphaFold-Multimer model, which can accurately predict the interactions of many proteins, is still unable to predict how or whether an antibody will bind to a given antigen (13). One of the key barriers to training specialized deep learning models for antibody-antigen complex prediction is the limited availability of experimentally determined structures. The large database of predicted antibody structures presented in this work may help reduce this barrier if it can be employed effectively. In the meantime, IgFold will provide immediate benefits to existing antibody-antigen docking methods. For traditional docking methods, the improvements to speed and accuracy by IgFold should be sufficient to make them more effective (49, 50). For newer docking methods that incorporate structural flexibility, the error estimates from IgFold may be useful for directing enhanced sampling (51).

Deep learning methods trained on antibody sequences and structures hold great promise for design of novel therapeutic and diagnostic molecules. Generative models trained on large numbers of natural antibody sequences can produce effective libraries for antibody discovery (28, 29). Self-supervised models have also proven effective for humanization of antibodies (27). Meanwhile, methods like AlphaFold and RoseTTAFold have been adapted for gradient-based design of novel protein structures and even scaffolding binding loops (52, 53). IgFold will enable similar applications, and will additionally be useful as an oracle to test or score novel antibody designs. Finally, embeddings from IgFold (particularly when injected with structural information from templates) will be useful features for future antibody design tasks.

## Code and Data Availability

Code and pre-trained models for IgFold will be made available at <https://github.com/Graylab/IgFold>. Paired antibody structures predicted by IgFold for the 104,994 OAS sequences will be made available online shortly. All structures generated by IgFold and alternative methods for benchmarking will be deposited at Zenodo and released upon publication.

## Methods

**A. Predicting antibody structure from sequence.** The architecture and training procedure for IgFold are described below. Full details of the model architecture hyperparameters are detailed in Table 3. In total, IgFold contains 1.6M trainable parameters.

**A.1. Generating AntiBERTy embeddings.** To generate input features for structure prediction, we use the pre-trained AntiBERTy language model (21). AntiBERTy is a bidirectional transformer trained by masked language modeling on a set of 558M antibody sequences from the Observed Antibody Space. For a given sequence, we collect from AntiBERTy the final hidden layer state and the attention matrices for all layers. The hidden state of dimension  $L \times 512$  is reduced to dimension  $L \times d_{\text{node}}$  by a fully connected layer. The attention matrices from all 8 layers of AntiBERTy (with 8 attention heads per layer) are stacked to form an  $L \times L \times 64$  tensor. The stacked attention tensor is transformed to dimension  $L \times d_{\text{edge}}$  by a fully connected layer.

**A.2. IgFold model implementation.** The IgFold model takes as input per-residue embeddings (nodes) and inter-residue attention features (edges). These initial features are processed by a series node updates via graph transformer layers (34) and edge updates via triangular multiplicative operations (10). Next, template data is incorporated via fixed-coordinate invariant point attention. Finally, the processed nodes and edges are used to predict the antibody backbone structure via invariant point attention. We detail each of these steps in the following subsections. Where possible, we use the same notation as in the original papers.

*Node updates via graph transformer layers.* Residue node embeddings are updated by graph transformer (GT) layers, which extend the powerful transformer architecture to include edge information (34). Each GT layer takes as input a series of node embeddings  $H^{(l)} = \{h_1, h_2, \dots, h_L\}$ , with  $h_i \in \mathbb{R}^{d_{\text{node}}}$ , and edges  $e_{ij} \in \mathbb{R}^{d_{\text{edge}}}$ . We calculate the multi-head attention for each node  $i$  to all other nodes  $j$  as follows:

$$q_{c,i} = \mathbf{W}_{c,q} h_i$$

$$k_{c,j} = \mathbf{W}_{c,k} h_j$$

$$e_{c,ij} = \mathbf{W}_{c,e} e_{ij}$$

379

380

$$\alpha_{c,ij} = \frac{\langle q_{c,i}, k_{c,j} + e_{c,ij} \rangle}{\sum_{u \in L} \langle q_{c,i}, k_{c,u} + e_{c,iu} \rangle}$$

381 where  $\mathbf{W}_{c,q}, \mathbf{W}_{c,k}, \mathbf{W}_{c,e} \in \mathbb{R}^{d_{\text{node}} \times d_{\text{gt-head}}}$  are learnable parameters for the key, query, and edge transformations for the  
382  $c$ -th attention head with hidden size  $d_{\text{gt-head}}$ . In the above,  $\langle q, k \rangle = \exp \frac{q^T k}{\sqrt{d}}$  is the exponential of the standard scaled  
383 dot product attention operation. Using the calculated attention, we aggregate updates from all nodes  $j$  to node  $i$  as  
384 follows:

385

386

387

$$v_{c,j} = \mathbf{W}_{c,v} h_j$$

$$\hat{h}_i = \parallel_c^C \left[ \sum_{j \in L} \alpha_{c,ij} (v_{c,j} + e_{c,ij}) \right]$$

388 where  $\mathbf{W}_{c,v} \in \mathbb{R}^{d_{\text{node}} \times d_{\text{gt-head}}}$  is a learnable parameter for the value transformation for the  $c$ -th attention head. In the  
389 above,  $\parallel$  is the concatenation operation over the outputs of the  $C$  attention heads. Following the original GT, we use  
390 a gated residual connection to combine the updated node embedding with the previous node embedding:

391

392

393

$$\beta_i = \text{sigm}(\mathbf{W}_g [\hat{h}_i; h_i; \hat{h}_i - h_i])$$

$$h_i^{\text{new}} = (1 - \beta_i) h_i + \beta_i \hat{h}_i$$

394 where  $\mathbf{W}_g \in \mathbb{R}^{3 \times d_{\text{node}} \times 1}$  is a learnable parameter that controls the strength of the gating function.

395 *Edge updates via triangular multiplicative operations.* Inter-residue edge embeddings are updated using the efficient  
396 triangular multiplicative operation proposed for AlphaFold (10). Following AlphaFold, we first calculate updates using  
397 the "outgoing" triangle edges, then the "incoming" triangle edges. We calculate the outgoing edge transformations as  
398 follows:

399

400

401

$$a_{ij} = \text{sigm}(\mathbf{W}_{a,g} e_{ij}) \mathbf{W}_{a,v} e_{ij}$$

$$b_{ij} = \text{sigm}(\mathbf{W}_{b,g} e_{ij}) \mathbf{W}_{b,v} e_{ij}$$

402 where  $\mathbf{W}_{a,v}, \mathbf{W}_{b,v} \in \mathbb{R}^{d_{\text{edge}} \times 2 \times d_{\text{edge}}}$  are learnable parameters for the transformations of the "left" and "right" edges  
403 of each triangle, and  $\mathbf{W}_{a,g}, \mathbf{W}_{b,g} \in \mathbb{R}^{d_{\text{edge}} \times 2 \times d_{\text{edge}}}$  are learnable parameters for their respective gating functions. We  
404 calculate the outgoing triangle update for edge  $ij$  as follows:

405

406

407

408

409

$$g_{ij}^{\text{out}} = \text{sigm}(\mathbf{W}_{c,g}^{\text{out}} e_{ij})$$

$$\hat{e}_{ij}^{\text{out}} = g_{ij}^{\text{out}} \odot \mathbf{W}_{c,v}^{\text{out}} \sum_{k \in L} (a_{ik} \odot b_{jk})$$

$$e_{ij}^{\text{new}} = e_{ij} + \hat{e}_{ij}^{\text{out}}$$

410 where  $\mathbf{W}_{c,v}^{\text{out}} \in \mathbb{R}^{2 \times d_{\text{edge}} \times d_{\text{edge}}}$  and  $\mathbf{W}_{c,g}^{\text{out}} \in \mathbb{R}^{d_{\text{edge}} \times d_{\text{edge}}}$  are learnable parameters for the value and gating transformations,  
411 respectively, for the outgoing triangle update to edge  $e_{ij}$ . After applying the outgoing triangle update, we calculate  
412 the incoming triangle update similarly as follows:

413

414

415

416

417

$$g_{ij}^{\text{in}} = \text{sigm}(\mathbf{W}_{c,g}^{\text{in}} e_{ij})$$

$$\hat{e}_{ij}^{\text{in}} = g_{ij}^{\text{in}} \odot \mathbf{W}_{c,v}^{\text{in}} \sum_{k \in L} (a_{ki} \odot b_{kj})$$

$$e_{ij}^{\text{new}} = e_{ij} + \hat{e}_{ij}^{\text{in}}$$

418 where  $\mathbf{W}_{c,v}^{\text{in}} \in \mathbb{R}^{2 \times d_{\text{edge}} \times d_{\text{edge}}}$  and  $\mathbf{W}_{c,g}^{\text{in}} \in \mathbb{R}^{d_{\text{edge}} \times d_{\text{edge}}}$  are learnable parameters for the value and gating transformations,  
419 respectively, for the incoming triangle update to edge  $e_{ij}$ . Note that  $a_{ij}$  and  $b_{ij}$  are calculated using separate sets of  
420 learnable parameters for the outgoing and incoming triangle updates.

421 *Template incorporation via invariant point attention.* To incorporate structural template information into the node  
422 embeddings, we adopt the invariant point attention (IPA) algorithm proposed for AlphaFold (10). The updated  
423 node and edge embeddings correspond to the single and paired representations, respectively, as described in the  
424 original implementation. The IPA layer is followed by a three-layer feedforward transition block as in the original  
425 implementation. Because our objective is to incorporate known structural data into the embedding, we omit the  
426 translational and rotational updates used in the AlphaFold structure module. We incorporate partial structure

427 information by masking the attention between residue pairs that do not both have known coordinates. As a result,  
428 when no template information is provided, the node embeddings are updated only using the transition layers.

429 *Structure realization via invariant point attention.* The processed node and edge embeddings are passed to a  
430 block of three IPA layers to predict the residue atomic coordinates. Following the structure module of AlphaFold,  
431 we adopt a "residue gas" representation, in which each residue is represented by an independent coordinate frame.  
432 The coordinate frame for each residue is defined by four atoms (N,  $C_\alpha$ , C, and  $C_\beta$ ) placed with ideal bond lengths  
433 and angles. We initialize the structure with all residue frames having  $C_\alpha$  at the origin and task the model with  
434 predicting a series of translations and rotations that assemble the complete structure. Contrary to the AlphaFold  
435 implementation, we do not share parameters across the IPA layers, but instead learn separate parameters for each  
436 layer.

437 **A.3. Training procedure.** The model is trained using a combination of structure prediction and error estimation loss  
438 terms. The primary structure prediction loss is the mean-squared-error between the predicted residue frame atom  
439 coordinates (N,  $C_\alpha$ , C, and  $C_\beta$ ) and the label coordinates after Kabsch alignment of all atoms. We additionally apply  
440 an L1 loss to the inter-atomic distances of the  $(i, i + 1)$  and  $(i, i + 2)$  backbone atoms to encourage proper bond  
441 lengths and secondary structures. Finally, we use an L1 loss for error prediction, where the label error is calculated as  
442 the  $C_\alpha$  deviation of each residue after Kabsch alignment of all atoms belonging to beta sheet residues. The total loss  
443 is the sum of the structure prediction loss, the inter-atomic distance loss, and the error prediction loss:

$$444 \text{Loss}(x_{\text{pred}}, x_{\text{label}}) = L_{\text{coords}} + \text{clamp}(10 \times L_{\text{bonds}}, 1) + L_{\text{error}}$$

445 where  $x_{\text{pred}}$  and  $x_{\text{label}}$  are the predicted and experimentally determined structures, respectively. We scale the bond  
446 length loss by a factor of 10 (effectively applying the loss on the nanometer scale) and clamp losses greater than  
447 1. Clamping the bond length loss allows the model to learn global arrangement of residues early in training then  
448 improve smaller details (e.g., bond lengths) later in training.

449 During training we sampled structures evenly between the SAbDab dataset (30) and the paired and unpaired  
450 synthetic structure datasets. We held out 10% of the SAbDab structures for validation during training. We used the  
451 RAdam optimizer (54) with an initial learning rate of  $5 \times 10^{-4}$ , with learning rate decayed on a cosine annealing  
452 schedule. We trained an ensemble of four models with different random seeds. Each model trained for  $2 \times 10^6$  steps,  
453 with a batch size of one structure. Training took approximately 110 hours per model on a single A100 GPU.

454 **A.4. Ensemble structure prediction.** To generate a structure prediction for a given sequence, we first make predictions  
455 with each of the four ensemble models. We then use the predicted error to select a single structure from the set  
456 of four. Rather than use the average predicted error over all residues, we instead rank the structures by the 90<sup>th</sup>  
457 percentile residue error. Typically, the 90<sup>th</sup> percentile residue error corresponds to the challenging CDR3 loop. Thus,  
458 we effectively select the structure with the lowest risk of significant error in the CDR3 loop.

## 459 B. Benchmarking antibody structure prediction methods.

460 **B.1. Benchmark datasets.** To evaluate the performance of IgFold and other antibody structure prediction methods, we  
461 collected a set of high-quality paired and single-chain antibody structures from SAbDab. To ensure none of the deep  
462 learning models were trained using structures in the benchmark, we only used structures deposited after July 1, 2021  
463 (after DeepAb, ABlooper, AlphaFold, and IgFold were trained). Structures were filtered at 99% sequence identity.  
464 From these structures, we selected those with resolution greater than 3.0 Å. Finally, we removed structures with  
465 CDR H3 loops longer than 20 residues (according to Chothia numbering). These steps resulted in 67 paired and 21  
466 single-chain antibody structures for benchmarking methods.

467 **B.2. Alternative methods.** We compared the performance of IgFold to four alternative methods for antibody structure  
468 prediction: ABodyBuilder, DeepAb, ABlooper, and AlphaFold. ABodyBuilder structures were predicted using the  
469 web server. Because the ABodyBuilder web server only allows exclusion of up to 50 PDB structures for grafting, we  
470 could not completely restrict access to newer structures. Instead, we omitted structures released after July 1, 2021  
471 (benchmark collection date) and with greater than 70% sequence identity. DeepAb structures are generated using  
472 the public code repository, with five decoys per sequence as recommended in the publication. ABlooper structures  
473 are predicted using the public code repository, with CDR loops built onto grafted frameworks from ABodyBuilder.  
474 AlphaFold (and AlphaFold-Multimer) structures were predicted using the public code repository. For nanobody  
475 predictions with AlphaFold, we used the CASP14 pre-trained models. For both AlphaFold and AlphaFold-Multimer,  
476 we made predictions with all five pre-trained models and selected the highest-ranked structure for benchmarking.

**Table 3. IgFold hyperparameters**

| Parameter                         | Value | Description                                           |
|-----------------------------------|-------|-------------------------------------------------------|
| $d_{\text{node}}$                 | 64    | Node dimension                                        |
| $d_{\text{edge}}$                 | 64    | Edge dimension                                        |
| $d_{\text{gt-head}}$              | 32    | Graph transformer attention head dimension            |
| $n_{\text{gt-head}}$              | 8     | Graph transformer attention head number               |
| $d_{\text{gt-ff-dim}}$            | 256   | Graph transformer feedforward transition dimension    |
| $n_{\text{gt-layers}}$            | 4     | Graph transformer layers                              |
| $d_{\text{ipa-temp-head-scalar}}$ | 16    | Template IPA scalar attention head dimension          |
| $d_{\text{ipa-temp-head-point}}$  | 4     | Template IPA point attention head dimension           |
| $n_{\text{ipa-temp-head}}$        | 8     | Template IPA attention head number                    |
| $d_{\text{ipa-temp-ff-dim}}$      | 64    | Template IPA feedforward transition dimension         |
| $d_{\text{ipa-temp-ff-layers}}$   | 3     | Template IPA feedforward transition layers            |
| $n_{\text{ipa-temp-layers}}$      | 2     | Template IPA layers                                   |
| $d_{\text{ipa-str-head-scalar}}$  | 16    | Structure IPA scalar attention head dimension         |
| $d_{\text{ipa-str-head-point}}$   | 4     | Structure IPA point attention head dimension          |
| $n_{\text{ipa-str-head}}$         | 8     | Structure IPA attention head number                   |
| $d_{\text{ipa-str-ff-dim}}$       | 64    | Structure IPA feedforward transition dimension        |
| $d_{\text{ipa-str-ff-layers}}$    | 3     | Structure IPA feedforward transition layers           |
| $n_{\text{ipa-str-layers}}$       | 3     | Structure IPA layers                                  |
| $d_{\text{ipa-err-head-scalar}}$  | 16    | Error prediction IPA scalar attention head dimension  |
| $d_{\text{ipa-err-head-point}}$   | 4     | Error prediction IPA point attention head dimension   |
| $n_{\text{ipa-err-head}}$         | 4     | Error prediction IPA attention head number            |
| $d_{\text{ipa-err-ff-dim}}$       | 64    | Error prediction IPA feedforward transition dimension |
| $d_{\text{ipa-err-ff-layers}}$    | 3     | Error prediction IPA feedforward transition layers    |
| $n_{\text{ipa-err-layers}}$       | 2     | Error prediction IPA layers                           |

477 We permitted the use of template structures released prior to July 1, 2021, though the AlphaFold authors note that  
 478 templates have a minimal effect on performance.

479 **ACKNOWLEDGMENTS.** We thank Dr. Jeremias Sulam (JHU) and Richard Shuai (UC Berkeley) for helpful discussions  
 480 throughout this work, Brennan Abanades (Oxford) for assistance with making ABlooper predictions, and Deniz Akpinaroglu  
 481 (UCSF) for comments on an early version of this manuscript. This work was supported by National Institutes of Health grants  
 482 R01-GM078221 (J.A.R., L.-S.C.) and R35-GM141881 (all authors) and AstraZeneca (J.A.R.). Computational resources were  
 483 provided by the Advanced Research Computing at Hopkins (ARCH).

- 484 1. George Georgiou, Gregory C Ippolito, John Beausang, Christian E Busse, Hedda Wardemann, and Stephen R Quake. The promise and challenge of high-throughput sequencing of the antibody  
 485 repertoire. *Nature biotechnology*, 32(2):158–168, 2014.
- 486 2. Daniel Neumeier, Alexander Yermanos, Andreas Agrafiotis, Lucia Csepregi, Tasnia Chowdhury, Roy A Ehling, Raphael Kuhn, Raphaël Brisset-Di Roberto, Mariangela Di Tacchio, Renan Antonialli,  
 487 et al. Phenotypic determinism and stochasticity in antibody repertoires of clonally expanded plasma cells. *bioRxiv*, 2021.
- 488 3. Sai T Reddy, Xin Ge, Aleksandr E Miklos, Randall A Hughes, Seung Hyun Kang, Kam Hon Hoi, Constantine Chrysostomou, Scott P Hunnicke-Smith, Brent L Iverson, Philip W Tucker, et al.  
 489 Monoclonal antibodies isolated without screening by analyzing the variable-gene repertoire of plasma cells. *Nature biotechnology*, 28(9):965–969, 2010.
- 490 4. Jared Adolf-Bryfogle, Oleks Kalyuzhnyi, Michael Kubitz, Brian D Weitzner, Xiaozhen Hu, Yumiko Adachi, William R Schief, and Roland L Dunbrack Jr. Rosettaantibodydesign (rabd): A general  
 491 framework for computational antibody design. *PLoS computational biology*, 14(4):e1006112, 2018.
- 492 5. Jared Adolf-Bryfogle, Qifang Xu, Benjamin North, Andreas Lehmann, and Roland L Dunbrack Jr. Pyigclassify: a database of antibody cdr structural classifications. *Nucleic acids research*, 43(D1):  
 493 D432–D438, 2015.
- 494 6. Juan C Almagro, Alexey Teplyakov, Jinquan Luo, Raymond W Sweet, Sreekumar Kodangattil, Francisco Hernandez-Guzman, and Gary L Gilliland. Second antibody modeling assessment (ama-ii),  
 495 2014.
- 496 7. Jeffrey A Ruffolo, Carlos Guerra, Sai Pooja Mahajan, Jeremias Sulam, and Jeffrey J Gray. Geometric potentials from deep learning improve prediction of cdr h3 loop structures. *Bioinformatics*, 36  
 497 (Supplement\_1):i268–i275, 2020.
- 498 8. James Dunbar, Angelika Fuchs, Jiye Shi, and Charlotte M Deane. Abangle: characterising the vh–vl orientation in antibodies. *Protein Engineering, Design & Selection*, 26(10):611–620, 2013.
- 499 9. Nicholas A Marze, Sergey Lyskov, and Jeffrey J Gray. Improved prediction of antibody vl–vh orientation. *Protein Engineering, Design and Selection*, 29(10):409–418, 2016.
- 500 10. John Jumper, Richard Evans, Alexander Pritzel, Tim Green, Michael Figurnov, Olaf Ronneberger, Kathryn Tunyasuvunakool, Russ Bates, Augustin Židek, Anna Potapenko, et al. Highly accurate  
 501 protein structure prediction with alphafold. *Nature*, 596(7873):583–589, 2021.
- 502 11. Minkyung Baek, Frank DiMaio, Ivan Anishchenko, Justas Dauparas, Sergey Ovchinnikov, Gyu Rie Lee, Jue Wang, Qian Cong, Lisa N Kinch, R Dustin Schaeffer, et al. Accurate prediction of protein  
 503 structures and interactions using a three-track neural network. *Science*, 373(6557):871–876, 2021.
- 504 12. Milot Mirdita, Konstantin Schütze, Yoshitaka Moriwaki, Lim Heo, Sergey Ovchinnikov, and Martin Steinegger. Colabfold-making protein folding accessible to all. *bioRxiv*, 2021.
- 505 13. Richard Evans, Michael O’Neill, Alexander Pritzel, Natasha Antropova, Andrew W Senior, Timothy Green, Augustin Židek, Russell Bates, Sam Blackwell, Jason Yim, et al. Protein complex prediction  
 506 with alphafold-multimer. *BioRxiv*, 2021.
- 507 14. Jeffrey A Ruffolo, Jeremias Sulam, and Jeffrey J Gray. Antibody structure prediction using interpretable deep learning. *Patterns*, 3(2):100406, 2022.
- 508 15. Brennan Abanades, Guy Georges, Alexander Bujotzek, and Charlotte M Deane. ABlooper: Fast accurate antibody cdr loop structure prediction with accuracy estimation. *bioRxiv*, 2021.
- 509 16. Deniz Akpinaroglu, Jeffrey A Ruffolo, Sai Pooja Mahajan, and Jeffrey J Gray. Improved antibody structure prediction by deep learning of side chain conformations. *BioRxiv*, 2021.
- 510 17. Alexander Rives, Joshua Meier, Tom Sercu, Siddharth Goyal, Zeming Lin, Jason Liu, Demi Guo, Myle Ott, C Lawrence Zitnick, Jerry Ma, et al. Biological structure and function emerge from scaling  
 511 unsupervised learning to 250 million protein sequences. *Proceedings of the National Academy of Sciences*, 118(15), 2021.
- 512 18. Ahmed Elnaggar, Michael Heinzinger, Christian Dallago, Ghaila Rihawi, Yu Wang, Llion Jones, Tom Gibbs, Tamas Feher, Christoph Angerer, Martin Steinegger, et al. Prottrans: towards cracking  
 513 the language of life’s code through self-supervised deep learning and high performance computing. *arXiv preprint arXiv:2007.06225*, 2020.

- 514 19. Joshua Meier, Roshan Rao, Robert Verkuil, Jason Liu, Tom Sercu, and Alexander Rives. Language models enable zero-shot prediction of the effects of mutations on protein function. *bioRxiv*, 2021.
- 515 20. Brian L Hie, Kevin K Yang, and Peter S Kim. Evolutionary velocity with protein language models predicts evolutionary dynamics of diverse proteins. *Cell Systems*, 2022.
- 516 21. Jeffrey A Ruffolo, Jeffrey J Gray, and Jeremias Sulam. Deciphering antibody affinity maturation with language models and weakly supervised learning. *arXiv preprint arXiv:2112.07782*, 2021.
- 517 22. Ratul Chowdhury, Nazim Bouatta, Surojit Biswas, Charlotte Rochereau, George M Church, Peter Karl Sorger, and Mohammed N AlQuraishi. Single-sequence protein structure prediction using language models from deep learning. *bioRxiv*, 2021.
- 518
- 519 23. Yiyu Hong, Juyong Lee, and Junsu Ko. A-prot: Protein structure modeling using msa transformer. *BMC bioinformatics*, 23(1):1–11, 2022.
- 520 24. Ali Madani, Ben Krause, Eric R Greene, Subu Subramanian, Benjamin P Mohr, James M Holton, Jose Luis Olmos, Caiming Xiong, Zachary Z Sun, Richard Socher, et al. Deep neural language modeling enables functional protein generation across families. *bioRxiv*, 2021.
- 521
- 522 25. Jinwoo Leem, Laura S Mitchell, James HR Farmery, Justin Barton, and Jacob D Galson. Deciphering the language of antibodies using self-supervised learning. *bioRxiv*, 2021.
- 523 26. Tobias H Olsen, Iain H Moal, and Charlotte M Deane. Ablang: An antibody language model for completing antibody sequences. *bioRxiv*, 2022.
- 524 27. David Prihoda, Jad Maamary, Andrew Waight, Veronica Juan, Laurence Fayadat-Dilman, Daniel Svozil, and Danny Asher Bitton. Biophi: A platform for antibody design, humanization and humanness evaluation based on natural antibody repertoires and deep learning. *bioRxiv*, 2021.
- 525
- 526 28. Jung-Eun Shin, Adam J Riesselman, Aaron W Kollasch, Conor McMahon, Elana Simon, Chris Sander, Aashish Manglik, Andrew C Kruse, and Debora S Marks. Protein design and variant prediction using autoregressive generative models. *Nature communications*, 12(1):1–11, 2021.
- 527
- 528 29. Richard W Shuai, Jeffrey A Ruffolo, and Jeffrey J Gray. Generative language modeling for antibody design. *bioRxiv*, 2021.
- 529 30. James Dunbar, Konrad Krawczyk, Jinwoo Leem, Terry Baker, Angelika Fuchs, Guy Georges, Jiye Shi, and Charlotte M Deane. Sabdab: the structural antibody database. *Nucleic acids research*, 42(D1):D1140–D1146, 2014.
- 530
- 531 31. Aleksandr Kovaltsuk, Jinwoo Leem, Sebastian Kelm, James Snowden, Charlotte M Deane, and Konrad Krawczyk. Observed antibody space: a resource for data mining next-generation sequencing of antibody repertoires. *The Journal of Immunology*, 201(8):2502–2509, 2018.
- 532
- 533 32. Mohammed AlQuraishi. Machine learning in protein structure prediction. *Current opinion in chemical biology*, 65:1–8, 2021.
- 534 33. Roshan Rao, Joshua Meier, Tom Sercu, Sergey Ovchinnikov, and Alexander Rives. Transformer protein language models are unsupervised structure learners. In *International Conference on Learning Representations*, 2020.
- 535
- 536 34. Yunsheng Shi, Zhengjie Huang, Shikun Feng, Hui Zhong, Wenjin Wang, and Yu Sun. Masked label prediction: Unified message passing model for semi-supervised classification. *arXiv preprint arXiv:2009.03509*, 2020.
- 537
- 538 35. Martin Steinegger and Johannes Söding. Clustering huge protein sequence sets in linear time. *Nature communications*, 9(1):1–8, 2018.
- 539 36. Rebecca F Alfrod, Andrew Leaver-Fay, Jeliazko R Jeliazkov, Matthew J O'Meara, Frank P DiMaio, Hahnbeom Park, Maxim V Shapovalov, P Douglas Renfrew, Vikram K Mulligan, Kalli Kappel, et al. The rosetta all-atom energy function for macromolecular modeling and design. *Journal of chemical theory and computation*, 13(6):3031–3048, 2017.
- 540
- 541 37. James Dunbar, Konrad Krawczyk, Jinwoo Leem, Claire Marks, Jaroslaw Nowak, Cristian Regep, Guy Georges, Sebastian Kelm, Bojana Popovic, and Charlotte M Deane. Sabpred: a structure-based antibody prediction server. *Nucleic acids research*, 44(W1):W474–W478, 2016.
- 542
- 543 38. Frauke Muecksch, Yiska Weisblum, Christopher O Barnes, Fabian Schmidt, Dennis Schaefer-Babajew, Zijun Wang, Julio CC Lorenzi, Andrew I Flyak, Andrew T DeLaisch, Kathryn E Huey-Tubman, et al. Affinity maturation of sars-cov-2 neutralizing antibodies confers potency, breadth, and resilience to viral escape mutations. *Immunity*, 54(8):1853–1868, 2021.
- 544
- 545 39. Chang Liu, Helen M Ginn, Wanwisa Dejnirattisai, Piyada Supasa, Beibei Wang, Aekkachai Tuekprakhon, Rungtiwa Nutalai, Daming Zhou, Alexander J Mentzer, Yuguang Zhao, et al. Reduced neutralization of sars-cov-2 b. 1.617 by vaccine and convalescent serum. *Cell*, 184(16):4220–4236, 2021.
- 546
- 547 40. Femke Van Bockstaele, Josefina-Beate Holz, and Hilde Revets. The development of nanobodies for therapeutic applications. *Current opinion in investigational drugs (London, England: 2000)*, 10(11):1212–1224, 2009.
- 548
- 549 41. Aroop Sircar, Kayode A Sanni, Jiye Shi, and Jeffrey J Gray. Analysis and modeling of the variable region of camelid single-domain antibodies. *The Journal of Immunology*, 186(11):6357–6367, 2011.
- 550
- 551 42. Jory A Goldsmith, Andrea M DiVenere, Jennifer A Maynard, and Jason S McLellan. Structural basis for antibody binding to adenylate cyclase toxin reveals rtx linkers as neutralization-sensitive epitopes. *PLoS pathogens*, 17(9):e1009920, 2021.
- 552
- 553 43. Claudia A Jette, Alexander A Cohen, Priyanti NP Gnanaprasam, Frauke Muecksch, Yu E Lee, Kathryn E Huey-Tubman, Fabian Schmidt, Theodora Hatziioannou, Paul D Bieniasz, Michel C Nussenzweig, et al. Broad cross-reactivity across sarbecoviruses exhibited by a subset of covid-19 donor-derived neutralizing antibodies. *Cell reports*, 36(13):109760, 2021.
- 554
- 555 44. J Schilz, U Binder, L Friedrich, M Gebauer, C Lutz, M Schlapsch, A Schiefner, and A Skerra. Molecular recognition of structurally disordered pro/ala-rich sequences (pas) by antibodies involves an ala residue at the hot spot of the epitope. *Journal of molecular biology*, 433(18):167113, 2021.
- 556
- 557 45. Juan C Almagro, Martha Pedraza-Escalona, Hugo Iván Arrieta, and Sonia Mayra Pérez-Tapia. Phage display libraries for antibody therapeutic discovery and development. *Antibodies*, 8(3):44, 2019.
- 558
- 559 46. Rahel Frick, Lene S Høydahl, Jan Petersen, M Fleur Du Pré, Shraddha Kumari, Grete Berntsen, Alisa E Dewan, Jeliazko R Jeliazkov, Kristin S Gunnarsen, Terje Frigstad, et al. A high-affinity human tcr-like antibody detects celiac disease gluten peptide–mhc complexes and inhibits t cell activation. *Science Immunology*, 6(62):eabg4925, 2021.
- 560
- 561 47. Wing Ki Wong, Sarah A Robinson, Alexander Bujotzek, Guy Georges, Alan P Lewis, Jiye Shi, James Snowden, Bruck Taddese, and Charlotte M Deane. Ab-liquity: identifying sequence-dissimilar antibodies that bind to the same epitope. In *MAbs*, volume 13, page 1873478. Taylor & Francis, 2021.
- 562
- 563 48. Sarah A. Robinson, Matthew I. J. Raybould, Constantin Schneider, Wing Ki Wong, Claire Marks, and Charlotte M. Deane. Epitope profiling using computational structural modelling demonstrated on coronavirus-binding antibodies. *PLoS Computational Biology*, 17(12):1–20, 12 2021. . URL <https://doi.org/10.1371/journal.pcbi.1009675>.
- 564
- 565 49. Aroop Sircar and Jeffrey J Gray. Snugdock: paratope structural optimization during antibody-antigen docking compensates for errors in antibody homology models. *PLoS computational biology*, 6(1):e1000644, 2010.
- 566
- 567 50. Jeliazko R Jeliazkov, Rahel Frick, Jing Zhou, and Jeffrey J Gray. Robustification of rosettaantibody and rosetta snugdock. *PLoS one*, 16(3):e0234282, 2021.
- 568
- 569 51. Ameya Harmalkar, Sai Pooja Mahajan, and Jeffrey J. Gray. Induced fit with replica exchange improves protein complex structure prediction. *bioRxiv*, 2021. . URL <https://www.biorxiv.org/content/early/2021/12/10/2021.12.08.471786>.
- 570
- 571 52. Christoffer Norn, Basile IM Wicky, David Juergens, Sirui Liu, David Kim, Doug Tischer, Brian Koepnick, Ivan Anishchenko, Foldit Players, David Baker, et al. Protein sequence design by conformational landscape optimization. *Proceedings of the National Academy of Sciences*, 118(11):e2017228118, 2021.
- 572
- 573 53. Jue Wang, Sidney Lisanza, David Juergens, Doug Tischer, Ivan Anishchenko, Minkyung Baek, Joseph L Watson, Jung Ho Chun, Lukas F Milles, Justas Dauparas, et al. Deep learning methods for designing proteins scaffolding functional sites. *bioRxiv*, 2021.
- 574
- 575 54. Liyuan Liu, Haoming Jiang, Pengcheng He, Weizhu Chen, Xiaodong Liu, Jianfeng Gao, and Jiawei Han. On the variance of the adaptive learning rate and beyond. *arXiv preprint arXiv:1908.03265*, 2019.
